# Supplementary material for: Neuronal Categorization and Discrimination of Social Behaviors in Primate Prefrontal Cortex
Source: PLOS journal article supplement (doi:10.1371/journal.pone.0052610), 2012-12-28
Supplement: S3 (10.1371/journal.pone.0052610.s003) [file journal.pone.0052610.s003]

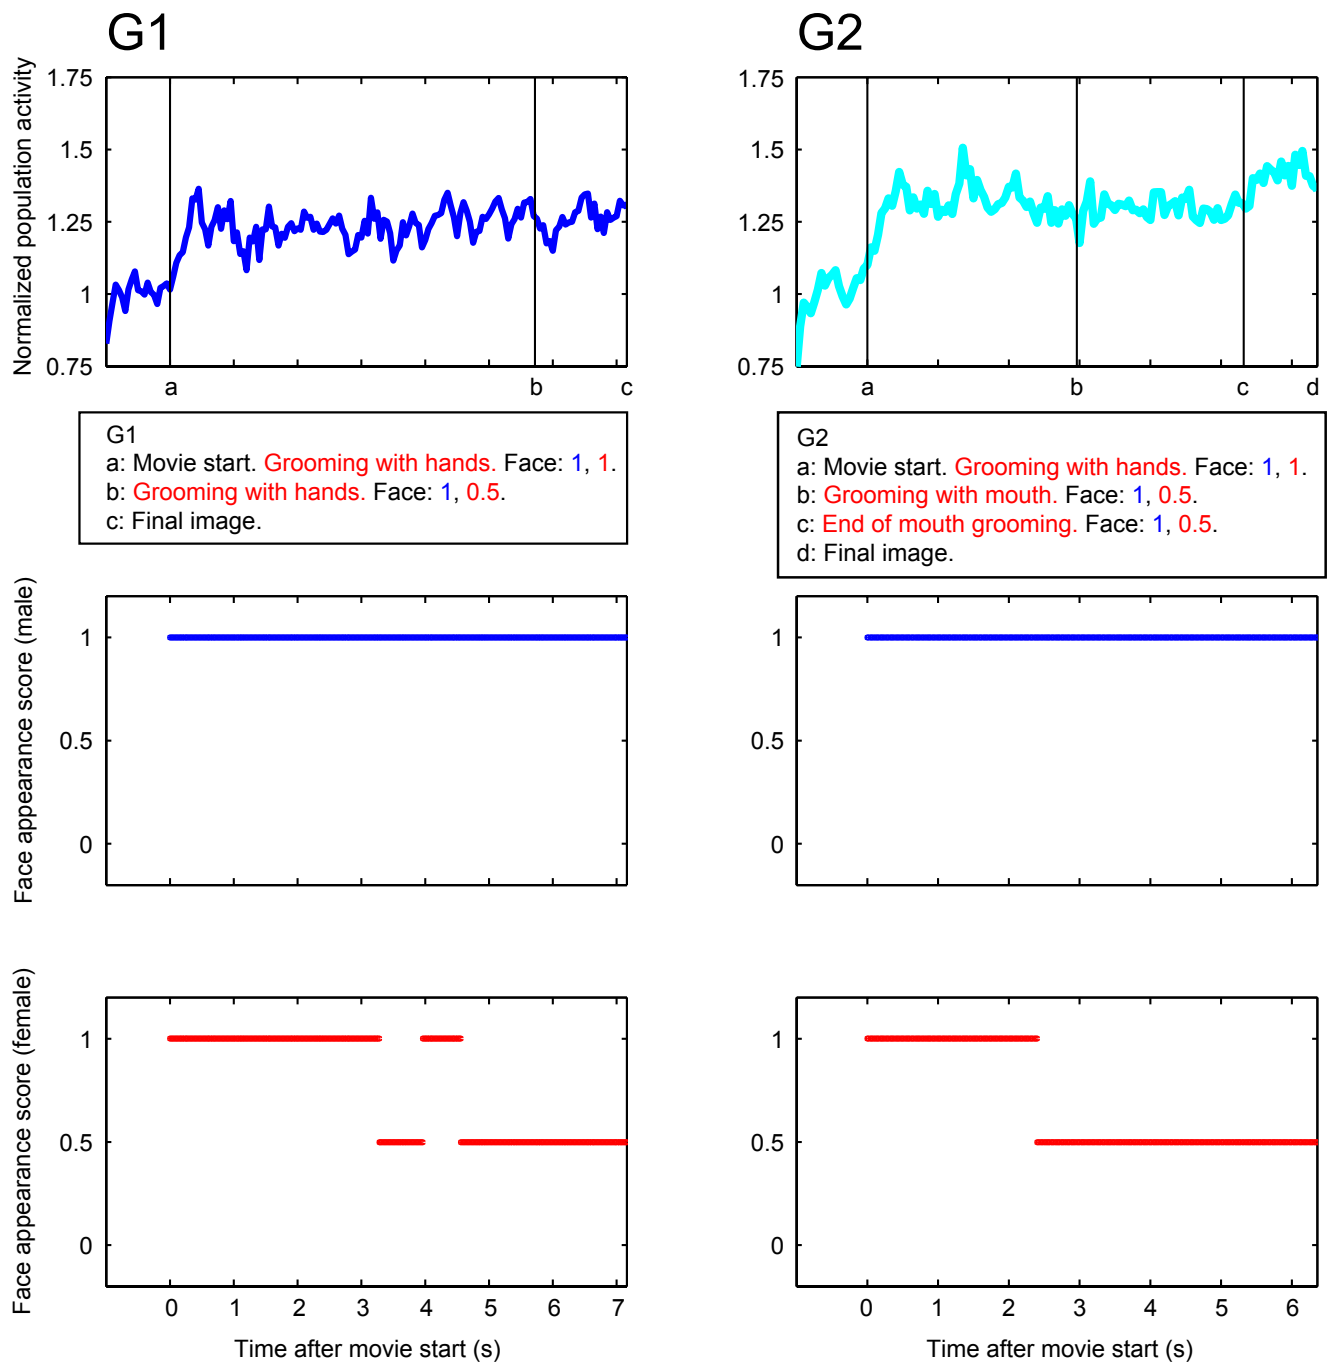

**Figure S3.**
